# Supplementary material for: The Expression of Decidual Protein Induced by Progesterone (DEPP) Is Controlled by Three Distal Consensus Hypoxia Responsive Element (HRE) in Hypoxic Retinal Epithelial Cells
Source: PubMed Central journal article supplement (PMC7016973; doi:10.3390/genes11010111), 2020-01-18
Supplement: genes-11-00111-s001.pdf [file genes-11-00111-s001.pdf]

## Supplemental Material

**Table S1.** Genomic coordinates of HREs relative to the TSS

| HRE                 | Sequence         | Distance from TSS      |
|---------------------|------------------|------------------------|
| 1 <sup>1)</sup>     | CCAGGTCC         | - 350 / - 357          |
| 2                   | GTGTGTGC         | - 367 / - 374          |
| 3                   | GTGTGTGC         | - 823 / - 830          |
| 4 + 5 <sup>2)</sup> | GCACGTGC         | - 846 / - 853          |
| 6                   | AGACATGC         | - 883 / - 890          |
| 7                   | <b>GCACCTGG</b>  | - 1091 / - 1098        |
| 8                   | ACACGCCT         | - 1245 / - 1252        |
| 9                   | <b>GCAGGTGG</b>  | - 1262 / - 1269        |
| 10                  | CCATGTGC         | - 1393 / - 1400        |
| 11                  | <b>GCACATGG</b>  | - 1452 / - 1459        |
| 12                  | <b>GCACTTCT</b>  | - 1459 / - 1466        |
| 13                  | <b>GCACACAC</b>  | - 1670 / - 1677        |
| 14                  | <b>GCAATGCTG</b> | - 1691 / - 1699        |
| 15                  | <b>GCAGGTCC</b>  | - 1759 / - 1766        |
| 16                  | CCACCTGC         | - 1778 / - 1785        |
| 17                  | <b>GCACCTCC</b>  | - 1838 / - 1845        |
| 18 <sup>1)</sup>    | GGAAGTGG         | - 2523 / - 2530        |
| 19                  | <b>GCAAGTAT</b>  | - 2838 / - 2845        |
| 20                  | GTGCGTGC         | - 2998 / - 3005        |
| 21 <sup>1)</sup>    | GGACATGG         | - 3092 / - 3099        |
| 22                  | <b>GCAAGTGG</b>  | - 3191 / - 3198        |
| 23 <sup>1)</sup>    | GGACCTGG         | - 3314 / - 3321        |
| 24                  | CCAGGTGC         | - 3339 / - 3346        |
| <u>25</u>           | <u>GGACGTGC</u>  | <u>- 3425 / - 3432</u> |
| <u>26</u>           | <u>GCACATCT</u>  | <u>- 3517 / - 3524</u> |
| <u>27</u>           | <u>ACACGCCC</u>  | <u>- 3551 / - 3558</u> |
| 28                  | <b>GCACGTAG</b>  | - 3563 / - 3570        |
| 29                  | GGATGTGC         | - 3615 / - 3622        |

Bold characters indicate the conserved core of the HRE. Underlined HREs were identified as necessary to induce DEPP under hypoxic conditions. <sup>1)</sup> Identified by JASPAR database as HRE but lacking the CGT (sense) or ACG (antisense) core. <sup>2)</sup> HRE 4+5 are found at the same location, but on opposite strands

**Table S2.** Primer used to amplify human DEPP promoter

| Forward (5'-3')                  | Reverse (5'-3')                   | Lenght  |
|----------------------------------|-----------------------------------|---------|
| <sup>1)</sup> acgg <u>GGTACC</u> | <sup>1)</sup> acgcc <u>GCTAGC</u> | 3759 bp |
| GTTGAGGAGCCCCTCGATGATCA          | CCTGAGCAGTGTGAAGAACCCTC           |         |

<sup>1)</sup> Extra nucleotides shown in small letters, cloning restriction sites underlined.

**Table S3.** Sequence of the 3759 kb regulatory region (5' → 3')

GTTGAGGAGCCCCTCGATGATCAGAGTCCCTTCTCCTGTGGGGTCCACACATCAGCCCTCCC  
CCAGAGCAGCTGCCTACCTTCCCTGTGCCCCCTAGGGATGGGATGCTCTGAACACTCAGGCCTT  
GCACATCCCTCCTCCTGAGTGGCCCCATCCCCTCAGGAAGGACCATCAGCCACTACGTGCCCTG  
GGCGTGTGACCAGGCCCTGTGGGAGGGAGCCTGAGATGTGCTCAGCTCATGCCTGGCCAGGG  
GCACAGCGCAGAACACAGTGGCTGAGTCAGGTGTCCCACAGGAAGCCAGCTGCTGGCCGGCA  
GGCACGTCCACACCGCGGTGAAGAAGTGGTTCAGGGACGCACAGCCTGTCTGCTCATGCCAA  
GCAGGGGACCTCTCTGCCCACTGCACCTGGGAGGGGTCCTGCGCCACCAGGTCCTATGGC  
CACCAGGCCCGGAGGGTCCCACACCCACCAGAGCAGAAGTGGGCACTCTCTGTCTAGCTGT  
GTCTCAGCCTCACCTTCTCCCGGTGCCTTCCAACAGCAGCAGCGTCCACTTGCCAGGGCTGAC  
AAAGGGTCTTGCTTTTCTCACCCTGCTTAGACATCACTAGCCCTATATCCCATAACCAGAATTC  
TACAACAGCCTTCATCCCATGTCCCCAACCTCCCTCGGTTTCCCTAGGTCTGCAGGTGACATGGC  
TTCTCTCCTGCTGCCAACCTGGGGCCCTAATCAACAGAGTCTCTGCACGCACCTTGCTAGTAGT  
GCTGGTTGGCACCCCTGGGGCCCTGATTCAGTGCCTCTGACCTATCCAGGCCTCTGTCTCTGC  
GAGACCACCCAGGCCTCTGTGCCAATCCCGGTCACTCTGTGTGTAAGCCTGGCCAAGCTGAGT  
CATTTGCCAGAATACTTGCCAGCAACCTCGGCTGCCCTCTACCCAGAGCCGCAGTCTCGAAACT  
ACACACTCCTAATGTGCTCTGACACTAGTCTTCCCACAATTAACCTTGAATATCATTCTCTCATT  
GCCATCTCAACCAACATTTAATTTTATTATTTATGTTTTATTGTGATAAGGACATTTAACATAAG  
AACTACCCTCTAAACAACTGTTCACTGCACAATACTGTATTGTTCACTGTAGGCACAACGTTG  
TCCAGCCCATATCCAGGACTTACTCATCTTGCATAGCTGAAAACATTATATCAGCTGCACAGCAA  
CTCTCCACTTCCCTCCCTGCCCGTCCCTGCAACCACCATTTTCACTCTCTGCCTCTATGAG  
CCTATTTTAGATTCTTATATAAGGGAATCATGCAGTATTTCTGACCCATATTTTAGATTACAAA  
ATCCCATTTCTCTCCTCGTTGGCACTAAAAGCCCTGTGAGAACAGGGACGCCATGGAAACTT  
CTTTGTATCCCTGGCAGCACTCAGGAAGACCCTGCACAATGTGGATTTTATGGTAACCTTAGAAA  
TGGGGTTTCTAGGTTCAAACATCCTGCCATCCACAGAGAAAATAGTGTATCCAAAGGTTATCAA  
ATATACACACAGCTTCCAGATATGACCTTGCACTATCTGCTAAAAAGGAAAACAAAACAAGCAG  
AAACCAGAGCTGTTTTGATACTCACTGGTGTCTACAAGCACAGATGTGTCACTGAGCTTCT  
ATGAAGGAGAGGCCAGCATGGATCTATGGAGTCAAAGGTCTATGGGGGGTCTGTCTTCTGCCT  
CTTGGTCTCGGGTGCCTCTCAGTGGAGAGAGCTTGTGGGGATGGCTCACTCATGGAGACCCACT  
GCCCTCCAGCCCCACCCTGGACGCCAGGCAGAGGAAGATGGAGCAGACACAGCCCTGGCCAC  
GAGGGGCTCGGGCTTGGACACAGAAGGAGATGCAATGGAGCTTCTTGGAGGAGGTGCTTGTGC  
ACTGCACCCTGGAAGACGAGTGAAGGGGGACGGGGAGGAAAGCTGAGCAGGTGGCCCTGACC  
TCAGGACCTGCCTGGACAAGGTGCGGGGCTTGGCTGTACTGGGGACAGCTGGCTCTCCATGA  
CTCAGGCCAGACATGCCTACACAGGTGATGTGTGTGCCCCCAACATAGCCGCCACTGTTACCC  
CTCCCCAGCTTGGCCGCATCTGAATGGAGGGAAAGCCCCGTCAGCCAGCAGCGAATTCTCCG  
CCTCCCTCCCTCTTTGGTCTCTTGACTAATCTGCTCATTGCTAATAAATTCAAAGAAGAGCCAG  
CGAACTAGACAAAGGGTCTACAAAAGATATAAGAGCTTGGGCAAGGTGAGAAGTGCCATGTG  
CCACTGAAATCCTGGTCACTGTCTCAGGCACTCCCTGCCCCGATGCCTTTGTGCACATGGAGTTC  
CCACCTAGAATTCAAGAACTTGGGACTGCCCGTCCCTCTGCTTGCCTAGGGAGTCTGGGGTCT  
GCCAGTACTCAGAGCTCAGGCTTGGGCTAACTCTCAAGACTCCTCTTTCTCCCCACCTGCAG  
CACAGGCAGGCGTGTCCAGGTGGGGCTGTGGCTGGGGCAGAGGATCTGTGGCCTGTCTGGGG  
AGTGCAGGAGCTTCCAGGGGCTGCCTCTCTATCCTTGGCAGCCTCCTTGTGTCATGTTCCATTT  
TCCTGGACAGATGCAGTGGCTTTCTAATGTTGCCAGGTGCTCCTTGGCAGCCCCCAGCCCCA  
GCCCCAGCCAGTCCAGCAGCTGCAGCGATCCTTTGAAGCAGAAGCCAGACTGCAGTGCCCT  
TGTTCAAACCCTGCAGTCTTCCCTCCCTCCTAGAGGGAAACACAGCATCCACCCCAAGGTCCA  
CTGACCCCTCCTACATGGGCCAGTCTGCAGGCCCTTGTGTGCCCTGAGCATGTCTGTCCGGC  
GCGCCCTACCCACAGGGGCTTTGCACGTGCTGCCCTGCCACCTGGAATGTGCATTTTCCATTT  
TTTTAGGTTTCTGCTCCAATATCTGCTCTTAGGGAAGACACCCCTGACCACTGTACCTGTGGCG  
GCAGCCCACCACAGCATGCCACTGCGCTGCTTTCCTTACGGCAGTCTTGTGTTGCCTGAATCA  
CAGACCCATTCTCTGCTTGGCTTGTCTCCTCCCTACTAGAATATGAGCTCCAGGGGGCCACA  
CCTTGTCCGCTGCTACGTTTGTGTGCTTAGTGCATTACAGCACACACTAGCACCTCATATCT  
GGTGAACAAGTAAACAAACAAATCCTCCGAAAGCACCCCATCTGGGGTGTAAAGAAGACCAGG  
GTCAGACCCCGCAGACCCGCTTGGTCCCTTGCAGCAGGGTGTGTCTCTCCTAGGAGCAGGCC

TAGGGACCCAGCCTCAGCTGCCTCCAGACTGGGGTCTGTGCTGCTGATTTTTTCATCAAAGTTGC  
CAAGGACCTGGCCAACTTCACAGGAGTCATGATGGGGTGGTGTAAACACAGAGTGGGAAACA  
AGCTTTGGGGCAGGGGTGGCCCTGGGGCTACCTGTGAGGGCCAGTGGAACCCCTCCCTCTCCC  
AGTGCCCTACTTGACCAGCAGTGAACCCACCCCTTCTGCCCTGCAGCGTAAACATTCCCA  
GCCTCCTACAGGCAGAAAAACACCTCCAAGCTGGCAGCTGGGCCAGGCCCCGCCACCAAGCT  
GTTTTCTAAGACAGCCTCCGAGTAGGCTATTTTTGGCCCTCGTGACAGTGATTGATAGCTGCT  
GGGAAGGTATAAAAGCAGCTTGCCTGCGAAGGTTCTTCA**C**<sup>1)</sup>ACTGCTCAGG

<sup>1)</sup> TSS is bold and underlined. TSS is base 0 and the first base after the TSS is +1

**Table S4.** Primers used to generate BLOCKs

| BLOCK                     | Forward (5'-3')                                   | Reverse (5'-3')                                    | Lenght                                             |      |
|---------------------------|---------------------------------------------------|----------------------------------------------------|----------------------------------------------------|------|
| BLOCK 1 <sup>1)</sup>     | acgg <u>GGTACC</u><br>AGCTCAGGCTTGGGCT<br>AACT    | acgcc <u>GCTAGC</u><br>CCTGAGCAGTGTGAAGAAC<br>CTTC | 1318                                               |      |
| BLOCK 2 <sup>1)</sup>     | acgg <u>GGTACC</u><br>TCTGACACTAGTCTTC<br>C       | acgcc <u>GCTAGC</u><br>AGTTAGCCCAAGCCT             | 1485                                               |      |
| BLOCK 3 <sup>1)</sup>     | acgg <u>GGTACC</u><br>GTTGAGGAGCCCCTCG<br>ATGATCA | acgcc <u>GCTAGC</u><br>TGTGGAAGACTAGTGTA<br>GAGC   | 997                                                |      |
| BLOCK 1 + 2 <sup>1)</sup> | acgg <u>GGTACC</u><br>TCTGACACTAGTCTTC<br>C       | acgcc <u>GCTAGC</u><br>CCTGAGCAGTGTGAAGAAC<br>CTTC | 2783                                               |      |
| BLOCK 2 + 3 <sup>1)</sup> | acgg <u>GGTACC</u><br>GTTGAGGAGCCCCTCG<br>ATGATCA | acgcc <u>GCTAGC</u><br>AGTTAGCCCAAGCCT             | 2461                                               |      |
| BLOCK 1 + 3 <sup>1)</sup> | Step 1                                            | acgg <u>GAGCTC</u><br>AGCTCAGGCTTGGGCT<br>AACT     | acgcc <u>GCTAGC</u><br>CCTGAGCAGTGTGAAGAAC<br>CTTC | 1318 |
|                           | Step 2                                            | acgg <u>GGTACC</u><br>GTTGAGGAGCCCCTCG<br>ATGATCA  | acgcc <u>GAGCTC</u><br>TGTGGAAGACTAGTGTA<br>GAGC   | 997  |

<sup>1)</sup> Extra nucleotides shown in small letters, cloning restriction sites underlined.

**Table S5.** Primers used for 5' end truncations

| HREs in fragments    | Forward (5'-3')                            | Reverse (5'-3')                                 | Lenght |
|----------------------|--------------------------------------------|-------------------------------------------------|--------|
| 1 - 26 <sup>1)</sup> | acgg <u>GGTACC</u><br>GAGGGAGCCTGAGATGTGCT | acgcc <u>GCTAGC</u><br>CCTGAGCAGTGTGAAGAACCCTTC | 3543   |
| 1 - 25 <sup>1)</sup> | acgg <u>GGTACC</u><br>CCTGGCCAGGGGCACAGCGC | acgcc <u>GCTAGC</u><br>CCTGAGCAGTGTGAAGAACCCTTC | 3514   |
| 1 - 24 <sup>1)</sup> | acgg <u>GGTACC</u><br>TGAAGAAGTGGTTCCAGGGA | acgcc <u>GCTAGC</u><br>CCTGAGCAGTGTGAAGAACCCTTC | 3423   |
| 1 - 19 <sup>1)</sup> | acgg <u>GGTACC</u><br>TGCTAGTAGTGCTGGTTGGC | acgcc <u>GCTAGC</u><br>CCTGAGCAGTGTGAAGAACCCTTC | 3003   |

<sup>1)</sup> Extra nucleotides shown in small letters, cloning restriction sites underlined.

**Table S6.** Primers used for site directed mutagenesis

| <b>HRE</b> |     | <b>consensus</b>  | <b>Forward (5'-3')</b>                   | <b>Reverse (5'-3')</b> |
|------------|-----|-------------------|------------------------------------------|------------------------|
| 29         | wt  | GGATG <u>TGC</u>  | AGGAGGGATGcatAAGGCCTGAGTGT               | CCTGAGTGGCCCCATCCC     |
|            | mut | GGATG <u>CAT</u>  | TCAGAG                                   |                        |
| 28         | wt  | CT <u>ACG</u> TGC | ATCAGCCACTgtaTGCCCTGGGGC                 | GGTCCTTCCTGAGGGGAT     |
|            | mut | CT <u>GTA</u> TGC |                                          |                        |
| 27         | wt  | GGG <u>CGT</u> GT | TGCCCTGGGGtacGTGACCAGGC                  | CGTAGTGGCTGATGGTCC     |
|            | mut | GGG <u>TAC</u> GT |                                          |                        |
| 26         | wt  | AGATG <u>TGC</u>  | GCCTGAGATGcatTCAGCTCATGCC                | TCCCTCCCACAGGGCCTG     |
|            | mut | AGATG <u>CAT</u>  |                                          |                        |
| 25         | wt  | GG <u>ACG</u> TGC | CGCGGTGTGGgta <sup>c</sup> catCTGCCGGCCA | GTGAAGAAGTGGTTCCAGG    |
|            | mut | GGG <u>TAC</u> AT |                                          |                        |
| 20         | wt  | GTGCG <u>TGC</u>  | GCAAGGTGCGcatAGAGGACTCTG                 | TAGTAGTGCTGGTTGGCA     |
|            | mut | GTGCG <u>CAT</u>  |                                          |                        |
